# Supplementary material for: Hydrophobic effects on supported ionic liquid phase Pd nanoparticle hydrogenation catalysts
Source: Royal Society of Chemistry journal article supplement (doi:10.1039/c4cp03063j), 2014-01-01
Supplement: c4cp03063j1.pdf [file c4cp03063j1.pdf]

## Supplementary Information

### **Hydrophobic effect on supported ionic liquid phase Pd nanoparticles hydrogenation catalysts**

Leandro Luza,<sup>a</sup> Aitor Gual,<sup>a</sup> Camila P. Rambor,<sup>a</sup> Dario Eberhardt<sup>b</sup>, Sérgio R. Teixeira,<sup>b</sup> Fabiano Bernardi,<sup>b</sup> Daniel L. Baptista<sup>b</sup> and Jairton Dupont<sup>a,\*</sup>

<sup>a</sup> Institute of Chemistry, UFRGS Avenida Bento Gonçalves, 9500 Porto Alegre 91501-970 RS Brazil Fax: (+55) 5133087304 E-mail: jairton.dupont@ufrgs.br

<sup>b</sup> Institute of Physics, UFRGS Avenida Bento Gonçalves, 9500 Porto Alegre 91501-970 RS Brazil

## Experimental

### 1. General methods

All syntheses were performed using standard Schlenk techniques under an argon atmosphere.  $\text{CH}_3\text{CN}$  and  $\text{CH}_2\text{Cl}_2$  were purified by standard procedures.[77] The ILs **B1–B4** were prepared by previously described procedures.[78] Elemental analyses of the organosilicas were carried out on a CHN Perkin Elmer M CHNS/O Analyzer 2400. The  $\text{N}_2$  isotherms of the supports, previously degassed at  $100^\circ\text{C}$  under vacuum for 3 h, were obtained using Tristar 3020 Micromeritics equipment. The specific surface areas were determined by the BET multipoint method and the average pore size was obtained by the BJH method. Solid-state  $^{13}\text{C}$  and  $^{29}\text{Si}$  NMR measurements for the **sg0–sgB4** supports were taken using a Varian 500 MHz spectrometer. The infrared spectra were obtained on an ABB FTLA 2000 with a resolution of  $4\text{ cm}^{-1}$ , with 128 cumulative scans. STEM samples were prepared by the slow evaporation of a drop of each colloidal solution deposited under an argon atmosphere onto a holey carbon-covered copper grid. STEM analyses were performed using an XFEG Cs-corrected FEI Titan 80/300 microscope at INMETRO operated at 200 kV. XRF analyses were performed using a Shimadzu Sequential XRF-1800 spectrometer. GC analyses were run with an Agilent Technologies GC System 6820 with a DB-17 column (oven temperature  $40^\circ\text{C}$ ). GC-MS analyses were run with a Shimadzu QP50 with a Rtx-5MS column (oven temperature  $40^\circ\text{C}$ ) employing an ionising voltage of 17 eV.[79]  $^1\text{H}$ ,  $^2\text{H}$ ,  $^{13}\text{C}$  NMR, COSY and HSQC analysis of the samples obtained by reduction with deuterium of 1,3-cyclohexadiene catalysed by Pd/**sg0** and Pd/**sgB4** catalysts were performed on a Varian 400 MHz. The deuterium incorporation in the reaction products was quantified by comparing the  $^1\text{H}$  NMR obtained spectra with those obtained using a standard sample and by carrying out  $^2\text{H}$  NMR (relaxation delay 1 to 10 s for both cases).[80, 81] The Pd depth profiles were determined using the RBS (Rutherford Backscattering Spectrometry) technique with a 1.5 MeV  $\text{He}^+$  incident beam provided by the 3 MV Tandatron accelerator of the IF-UFRGS. The backscattered particles were detected by an Si surface-barrier detector placed at a scattering angle of  $165^\circ$ . The electronic resolution of the system was around 13 keV. The energy to

depth conversion was accomplished by using stopping power values provided by the SRIM code (2013.00 version).[82]

## 2. Synthesis of the **B1–B4** ILs

1-n-Butylimidazole (6.2 g, 50 mmol) was reacted with 3-chloropropyltrimethoxysilane (9.9 g, 50 mmol) at 90°C under an inert atmosphere for 72 h. The reaction mixture was cooled to room temperature and then washed with dry diethyl ether. After being dried under reduced pressure at 40°C, a slightly yellow viscous liquid 1-n-butyl-3-(3-trimethoxysilylpropyl)-imidazolium chloride (**B1**) was obtained and stored under inert atmosphere for further characterisation and application (yield: 14.5 g, 90%). To a solution of **B1** (3.2 g, 10 mmol) in dry acetonitrile (10 mL), the desired salt AgNO<sub>3</sub> (1.7 g, 9.8 mmol), AgPF<sub>6</sub> (2.5 g, 9.8 mmol) or LiNTf<sub>2</sub> (3.4 g, 12 mmol) was added and the resulting mixture was vigorously stirred at room temperature under inert atmosphere for 24 h. After that, the solution was filtered and washed with dry CH<sub>2</sub>Cl<sub>2</sub>. After being dried under reduced pressure at 40°C, in each case, a yellow viscous liquid was obtained and stored under an inert atmosphere for their further characterisation and application, thus providing the ILs **B2**, **B3** and **B4**.

**B1** IL: <sup>1</sup>H NMR (CD<sub>3</sub>CN, 400MHz): δ (ppm) 0.57–0.63 (t, 2H, *J* = 8.49 Hz, SiCH<sub>2</sub>CH<sub>2</sub>CH<sub>2</sub>N), 0.91–0.96 (t, 3H, *J* = 7.32 Hz, NCH<sub>2</sub>CH<sub>2</sub>CH<sub>2</sub>CH<sub>3</sub>), 1.25–1.39 (m, 2H, NCH<sub>2</sub>CH<sub>2</sub>CH<sub>2</sub>CH<sub>3</sub>), 1.81–1.85 (m, 4H, SiCH<sub>2</sub>CH<sub>2</sub>CH<sub>2</sub>N, NCH<sub>2</sub>CH<sub>2</sub>CH<sub>2</sub>CH<sub>3</sub>), 3.52 (s, 9H, CH<sub>3</sub>OSi), 4.22–4.36 (m, 4H, SiCH<sub>2</sub>CH<sub>2</sub>CH<sub>2</sub>N, NCH<sub>2</sub>CH<sub>2</sub>CH<sub>2</sub>CH<sub>3</sub>), 7.70 (s, 2H, NCHCHN), and 10.08 (s, 1H, NCHN). <sup>13</sup>C NMR (CD<sub>3</sub>CN, 400MHz): δ (ppm) 6.2 (SiCH<sub>2</sub>CH<sub>2</sub>CH<sub>2</sub>N), 13.6 (NCH<sub>2</sub>CH<sub>2</sub>CH<sub>2</sub>CH<sub>3</sub>), 19.8 (NCH<sub>2</sub>CH<sub>2</sub>CH<sub>2</sub>CH<sub>3</sub>), 24.4 (SiCH<sub>2</sub>CH<sub>2</sub>CH<sub>2</sub>N), 32.5 (NCH<sub>2</sub>CH<sub>2</sub>CH<sub>2</sub>CH<sub>3</sub>), 49.8 (NCH<sub>2</sub>CH<sub>2</sub>CH<sub>2</sub>CH<sub>3</sub>), 50.8 (CH<sub>3</sub>OSi), 52.1 (SiCH<sub>2</sub>CH<sub>2</sub>CH<sub>2</sub>N), 123.1 (NCHCHN), and 137.7 (NCHN). Yield: 14.5 g; 90%.

**B2** IL: <sup>1</sup>H NMR (CD<sub>3</sub>CN, 400MHz): δ (ppm) 0.57–0.63 (t, 2H, *J* = 8.50 Hz, SiCH<sub>2</sub>CH<sub>2</sub>CH<sub>2</sub>N), 0.92–0.97 (t, 3H, *J* = 7.33 Hz, NCH<sub>2</sub>CH<sub>2</sub>CH<sub>2</sub>CH<sub>3</sub>), 1.28–1.40

(m, 2H, NCH<sub>2</sub>CH<sub>2</sub>CH<sub>2</sub>CH<sub>3</sub>), 1.80–1.87 (m, 4H, SiCH<sub>2</sub>CH<sub>2</sub>CH<sub>2</sub>N, NCH<sub>2</sub>CH<sub>2</sub>CH<sub>2</sub>CH<sub>3</sub>), 3.55 (s, 9H, CH<sub>3</sub>OSi), 4.17–4.25 (m, 4H, SiCH<sub>2</sub>CH<sub>2</sub>CH<sub>2</sub>N, NCH<sub>2</sub>CH<sub>2</sub>CH<sub>2</sub>CH<sub>3</sub>), 7.54 (s, 2H, NCHCHN), and 9.17 (s, 1H, NCHN). <sup>13</sup>C NMR (CD<sub>3</sub>CN, 400MHz): δ (ppm) 6.3 (SiCH<sub>2</sub>CH<sub>2</sub>CH<sub>2</sub>N), 13.7 (NCH<sub>2</sub>CH<sub>2</sub>CH<sub>2</sub>CH<sub>3</sub>), 20.0 (NCH<sub>2</sub>CH<sub>2</sub>CH<sub>2</sub>CH<sub>3</sub>), 24.1 (SiCH<sub>2</sub>CH<sub>2</sub>CH<sub>2</sub>N), 32.5 (NCH<sub>2</sub>CH<sub>2</sub>CH<sub>2</sub>CH<sub>3</sub>), 50.2 (NCH<sub>2</sub>CH<sub>2</sub>CH<sub>2</sub>CH<sub>3</sub>), 50.9 (CH<sub>3</sub>OSi), 52.5 (SiCH<sub>2</sub>CH<sub>2</sub>CH<sub>2</sub>N), 123.4 (NCHCHN), and 137.2 (NCHN). Yield: 3.2 g; 95%.

**B3 IL.** <sup>1</sup>H NMR (CD<sub>3</sub>CN, 400MHz): δ (ppm) 0.59–0.64 (t, 2H, *J* = 8.50 Hz, SiCH<sub>2</sub>CH<sub>2</sub>CH<sub>2</sub>N), 0.96–1.01 (t, 3H, *J* = 7.31 Hz, NCH<sub>2</sub>CH<sub>2</sub>CH<sub>2</sub>CH<sub>3</sub>), 1.29–1.43 (m, 2H, NCH<sub>2</sub>CH<sub>2</sub>CH<sub>2</sub>CH<sub>3</sub>), 1.81–1.96 (m, 4H, SiCH<sub>2</sub>CH<sub>2</sub>CH<sub>2</sub>N, NCH<sub>2</sub>CH<sub>2</sub>CH<sub>2</sub>CH<sub>3</sub>), 3.57 (s, 9H, CH<sub>3</sub>OSi), 4.12–4.19 (m, 4H, SiCH<sub>2</sub>CH<sub>2</sub>CH<sub>2</sub>N, NCH<sub>2</sub>CH<sub>2</sub>CH<sub>2</sub>CH<sub>3</sub>), 7.43 (s, 2H, NCHCHN), and 8.45 (s, 1H, NCHN). <sup>13</sup>C NMR (CD<sub>3</sub>CN, 400MHz): δ (ppm) 6.3 (SiCH<sub>2</sub>CH<sub>2</sub>CH<sub>2</sub>N), 13.7 (NCH<sub>2</sub>CH<sub>2</sub>CH<sub>2</sub>CH<sub>3</sub>), 20.0 (NCH<sub>2</sub>CH<sub>2</sub>CH<sub>2</sub>CH<sub>3</sub>), 24.4 (SiCH<sub>2</sub>CH<sub>2</sub>CH<sub>2</sub>N), 32.4 (NCH<sub>2</sub>CH<sub>2</sub>CH<sub>2</sub>CH<sub>3</sub>), 50.3 (NCH<sub>2</sub>CH<sub>2</sub>CH<sub>2</sub>CH<sub>3</sub>), 51.0 (CH<sub>3</sub>OSi), 52.6 (SiCH<sub>2</sub>CH<sub>2</sub>CH<sub>2</sub>N), 123.4 (NCHCHN), and 136.2 (NCHN). Yield: 4.0 g; 94%.

**B4 IL:** <sup>1</sup>H NMR (CD<sub>3</sub>CN, 400MHz): δ (ppm) 0.59–0.65 (t, 2H, *J* = 8.49 Hz, SiCH<sub>2</sub>CH<sub>2</sub>CH<sub>2</sub>N), 0.90–0.93 (t, 3H, *J* = 7.30 Hz, NCH<sub>2</sub>CH<sub>2</sub>CH<sub>2</sub>CH<sub>3</sub>), 1.19–1.32 (m, 2H, NCH<sub>2</sub>CH<sub>2</sub>CH<sub>2</sub>CH<sub>3</sub>), 1.83–1.95 (m, 4H, SiCH<sub>2</sub>CH<sub>2</sub>CH<sub>2</sub>N, NCH<sub>2</sub>CH<sub>2</sub>CH<sub>2</sub>CH<sub>3</sub>), 3.62 (s, 9H, CH<sub>3</sub>OSi), 4.20–4.35 (m, 4H, SiCH<sub>2</sub>CH<sub>2</sub>CH<sub>2</sub>N, NCH<sub>2</sub>CH<sub>2</sub>CH<sub>2</sub>CH<sub>3</sub>), 7.35 (s, 2H, NCHCHN), and 8.75 (s, 1H, NCHN). <sup>13</sup>C NMR (CD<sub>3</sub>CN, 400MHz): δ (ppm) 6.1 (SiCH<sub>2</sub>CH<sub>2</sub>CH<sub>2</sub>N), 13.8 (NCH<sub>2</sub>CH<sub>2</sub>CH<sub>2</sub>CH<sub>3</sub>), 19.8 (NCH<sub>2</sub>CH<sub>2</sub>CH<sub>2</sub>CH<sub>3</sub>), 24.5 (SiCH<sub>2</sub>CH<sub>2</sub>CH<sub>2</sub>N), 32.0 (NCH<sub>2</sub>CH<sub>2</sub>CH<sub>2</sub>CH<sub>3</sub>), 49.7 (NCH<sub>2</sub>CH<sub>2</sub>CH<sub>2</sub>CH<sub>3</sub>), 50.6 (CH<sub>3</sub>OSi), 52.0 (SiCH<sub>2</sub>CH<sub>2</sub>CH<sub>2</sub>N), 115.5, 118.6, 121.7 (CF<sub>3</sub>), 123.5 (NCHCHN), 124.8 (CF<sub>3</sub>), and 138.0 (NCHN). Yield: 5.3 g; 95%.

### 3. Synthesis of the **sg0–sgB4** organosilica supports

As a general procedure, a mixture of IL (**B1–B4**), TEOS, and H<sub>2</sub>O with a molar ratio of 0.05:1.0:10.5 was dissolved in acetone (0.35 × V<sub>TEOS</sub>) and heated

at 60°C under vigorous stirring. After 10 min, aqueous HF (5.0 M, molar ratio of HF to TEOS of 1:100) was added to the solution. After 24 h, the resultant solid material was cooled to room temperature, washed with acetone and dried under reduced pressure at 60°C to remove the volatile components, thus providing the supports (**sgB1–sgB4**). The support **sg0** was synthesised in the absence of IL. The white powders were recovered and stored under inert atmosphere for their further characterisation and application.

#### *4. Sputtering deposition of Pd-NPs onto organosilica supports*

As a general procedure, each support (2.0 g of **sg0**, **sgB1**, **sgB2**, **sgB3** and **sgB4**) was placed into a conical aluminium flask and placed inside the vacuum chamber. Then, the chamber was closed and its pressure lowered to a base pressure of 4  $\mu$ bar, with the supports being evacuated at this pressure for 4 h. Then, the vacuum chamber was placed under a sputtering working pressure of 4 mbar by adding Ar flow. The supports were continuously homogenised by revolving the aluminium flask at a vibration frequency of 24 Hz. The Pd was sputtered onto the revolving support at 35 mA of discharge current during 3.0 min to give the Pd/**sg0**–Pd/**sgB4** catalysts. After the deposition, the chamber was vented with N<sub>2</sub> and the grey powders were recovered and stored under an inert atmosphere for their further characterisation and application.

#### *5. Hydrogenation of 1,3-dienes*

As a general procedure, 10 mL of a solution of the corresponding 1,3-diene (diene/Pd = 5000) dissolved in CH<sub>2</sub>Cl<sub>2</sub> was added to a Fischer-Porter reactor containing the appropriate amount of catalysts (0.1  $\mu$ mol Pd). After that, the reactor was pressurised with 4 bar of H<sub>2</sub> at 40°C. Samples were taken from the reaction mixture every 5 min. After the desired reaction time, the reactor was cooled to room temperature and then depressurised. The conversion and selectivity was determined by GC-analysis of the reaction samples. The activity values were calculated from the slope of plots of time vs. TON at low substrate conversions: TOF = mol 1,3-diene converted/(mol Pd surface  $\times$  time).



Table S1.  $^{13}\text{C}$  CP-MAS NMR spectra of **sg0–sgB4** supports.

| Support     | Carbon/ ppm             |      |      |                         |       |                         |      |      |
|-------------|-------------------------|------|------|-------------------------|-------|-------------------------|------|------|
|             | (a), (j) <sup>[a]</sup> | (b)  | (c)  | (d), (h) <sup>[a]</sup> | (e)   | (f), (g) <sup>[a]</sup> | (i)  | MeOH |
| <b>sg0</b>  | —                       | —    | —    | —                       | —     | —                       | —    | —    |
| <b>sgB1</b> | 11.3                    | 19.4 | 32.0 | 50.4                    | 135.9 | 123.3                   | 23.5 | —    |
| <b>sgB2</b> | 11.3                    | 19.4 | 32.0 | 50.4                    | 135.2 | 122.5                   | 24.2 | 58.4 |
| <b>sgB3</b> | 12.8                    | 19.4 | 31.5 | 50.2                    | 135.0 | 122.3                   | 23.9 | 58.5 |
| <b>sgB4</b> | 12.3                    | 17.3 | 32.4 | 51.1                    | 136.3 | 123.6                   | 24.3 | 59.1 |

<sup>[a]</sup> Overlapped signals.

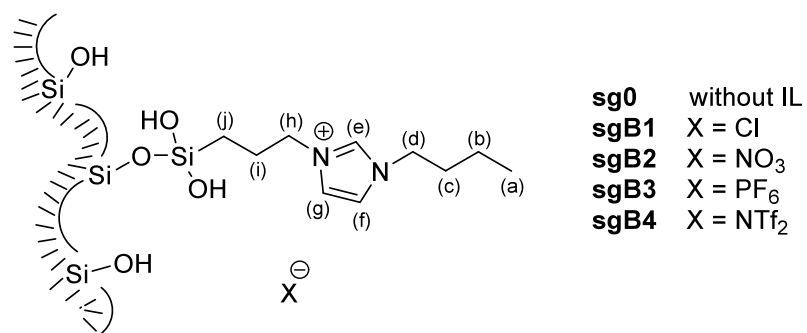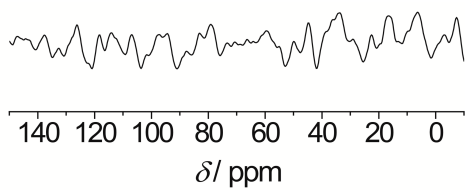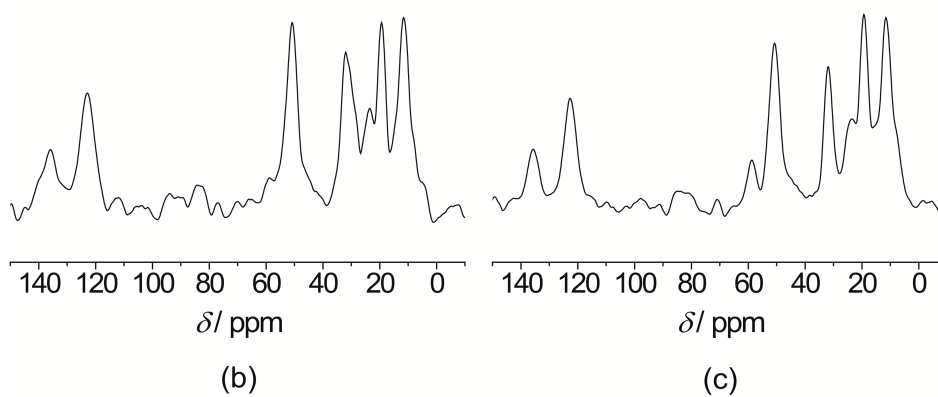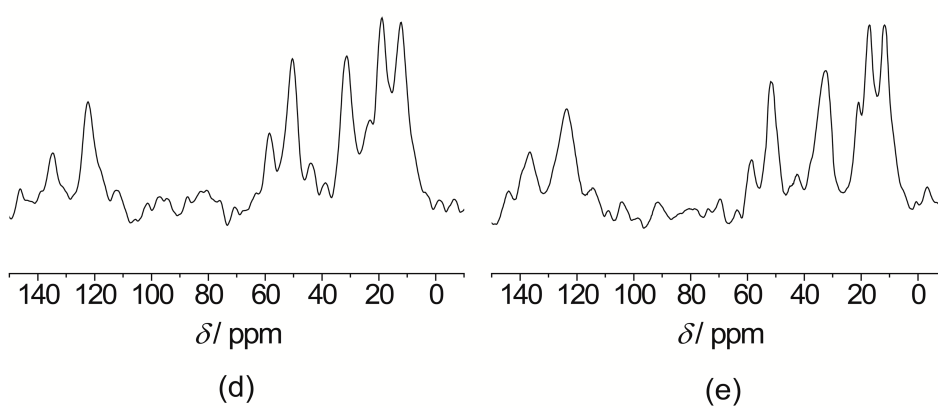

Figure S1. <sup>13</sup>C CP-MAS NMR spectra of (a) **sg0**, (b) **sgB1**, (c) **sgB2**, (d) **sgB3** and (e) **sgB4** supports.

Table S2. FT-IR spectra of **sg0–sgB4** supports.

| Attribution                              | Wavenumber/ $\text{cm}^{-1}$ |             |             |             |             |
|------------------------------------------|------------------------------|-------------|-------------|-------------|-------------|
|                                          | <b>sg0</b>                   | <b>sgB1</b> | <b>sgB2</b> | <b>sgB3</b> | <b>sgB4</b> |
| $\nu$ (OH)                               | 3420                         | 3440        | 3450        | 3450        | 3446        |
| $\nu$ (=C-H)                             | —                            | 3149        | 3155        | 3157        | 3154        |
| $\nu_{\text{as}}$ (C-H)                  | —                            | 2968        | 2970        | 2970        | 2974        |
| $\nu_{\text{as}}$ (C-H)                  | —                            | 2941        | 2941        | 2941        | 2941        |
| $\nu$ (C-H)                              | —                            | 2881        | 2881        | 2879        | 2883        |
| $\delta$ (H-O-H)                         | 1631                         | 1641        | 1654        | 1652        | 1641        |
| $\nu$ (C=N)                              | —                            | 1566        | 1571        | 1571        | 1570        |
| $\nu$ (C=C)                              | —                            | 1566        | 1571        | 1571        | 1570        |
| $\delta$ (CH <sub>2</sub> )              | —                            | 1463        | 1467        | 1458        | 1465        |
| $\nu$ (N-O)                              | —                            | —           | 1385        | —           | —           |
| $\nu_{\text{as}}$ (SO <sub>2</sub> )     | —                            | —           | —           | —           | 1352        |
| $\nu_{\text{as}}$ (SO <sub>2</sub> )     | —                            | —           | —           | —           | 1332        |
| $\nu_{\text{as}}$ (CF <sub>3</sub> )     | —                            | —           | —           | —           | 1207        |
| $\nu_{\text{as}}$ (Si-O-Si) <sub>L</sub> | 1191                         | 1190        | 1188        | 1189        | 1197        |
| $\nu_{\text{as}}$ (Si-O-Si) <sub>T</sub> | 1091                         | 1087        | 1093        | 1089        | 1095        |
| $\nu$ (S-N-S)                            | —                            | —           | —           | —           | 1064        |
| $\nu$ (Si-OH)                            | 956                          | 964         | 960         | 962         | 962         |
| $\nu$ (P-F)                              | —                            | —           | —           | 846         | —           |
| $\nu$ (Si-O-Si) <sub>T</sub>             | 796                          | 798         | 798         | 798         | 796         |
| $\nu_{\text{as}}$ (P-F)                  | —                            | —           | —           | 741         | —           |

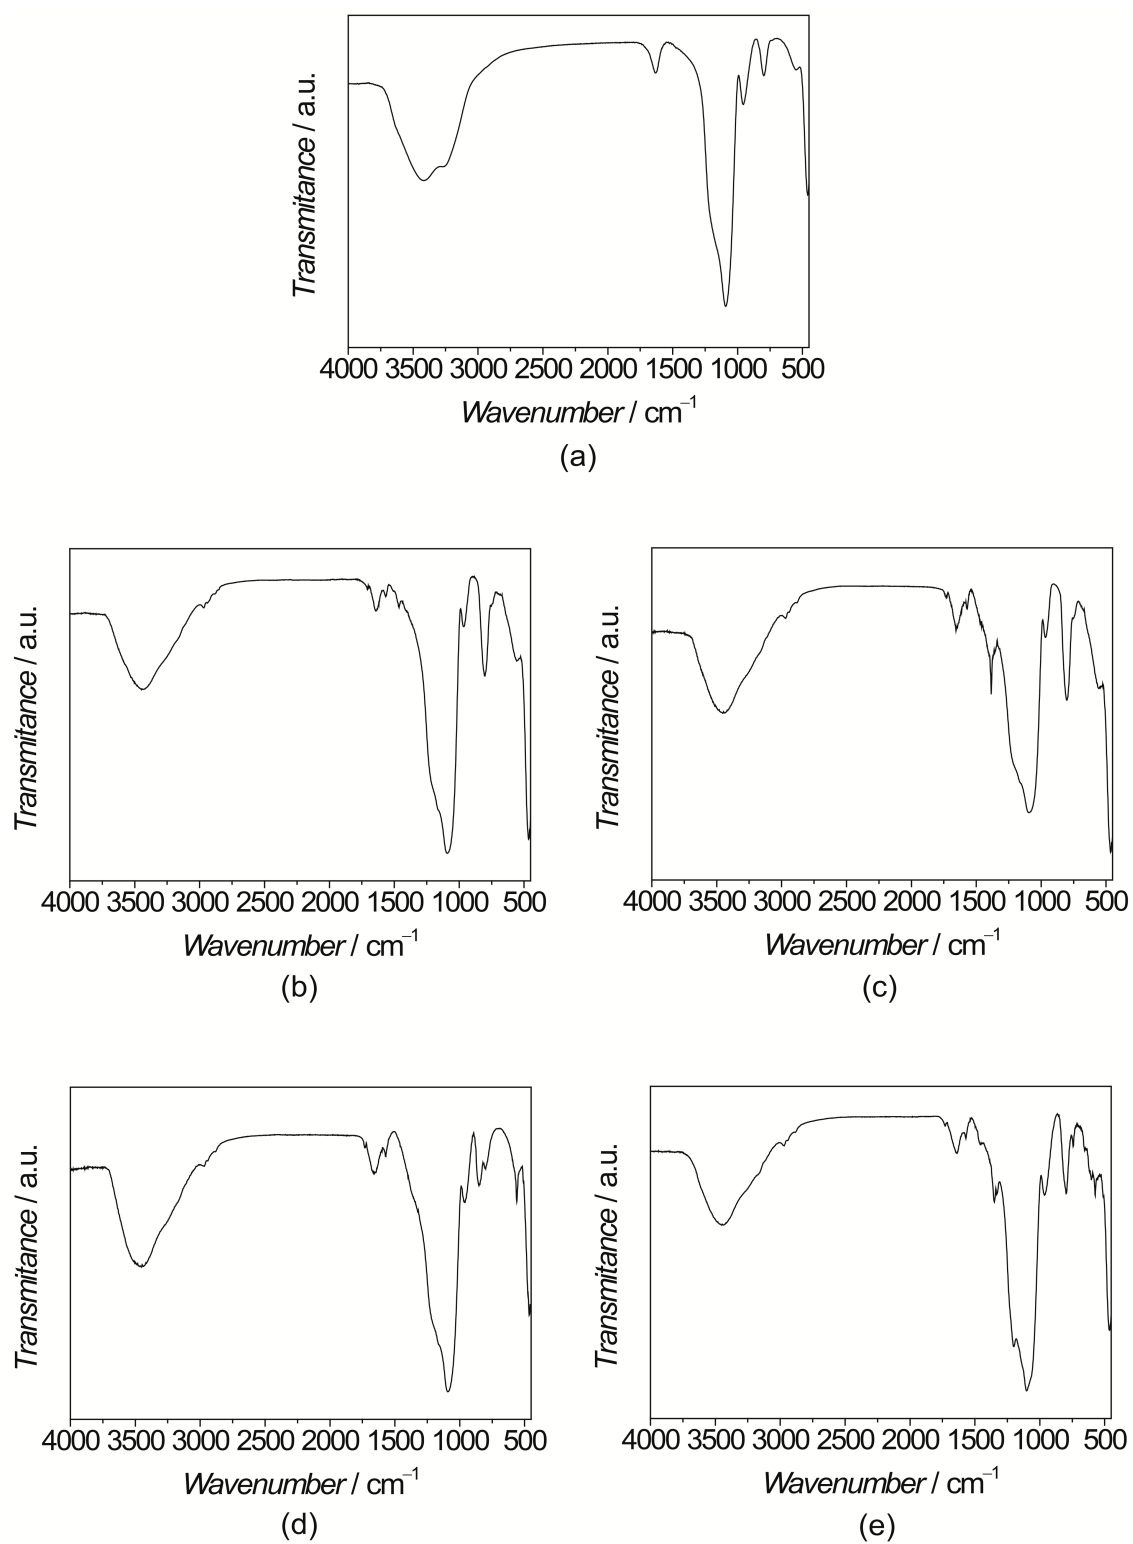

Figure S2. FT-IR spectra of (a) **sg0**, (b) **sgB1**, (c) **sgB2**, (d) **sgB3** and (e) **sgB4** supports.

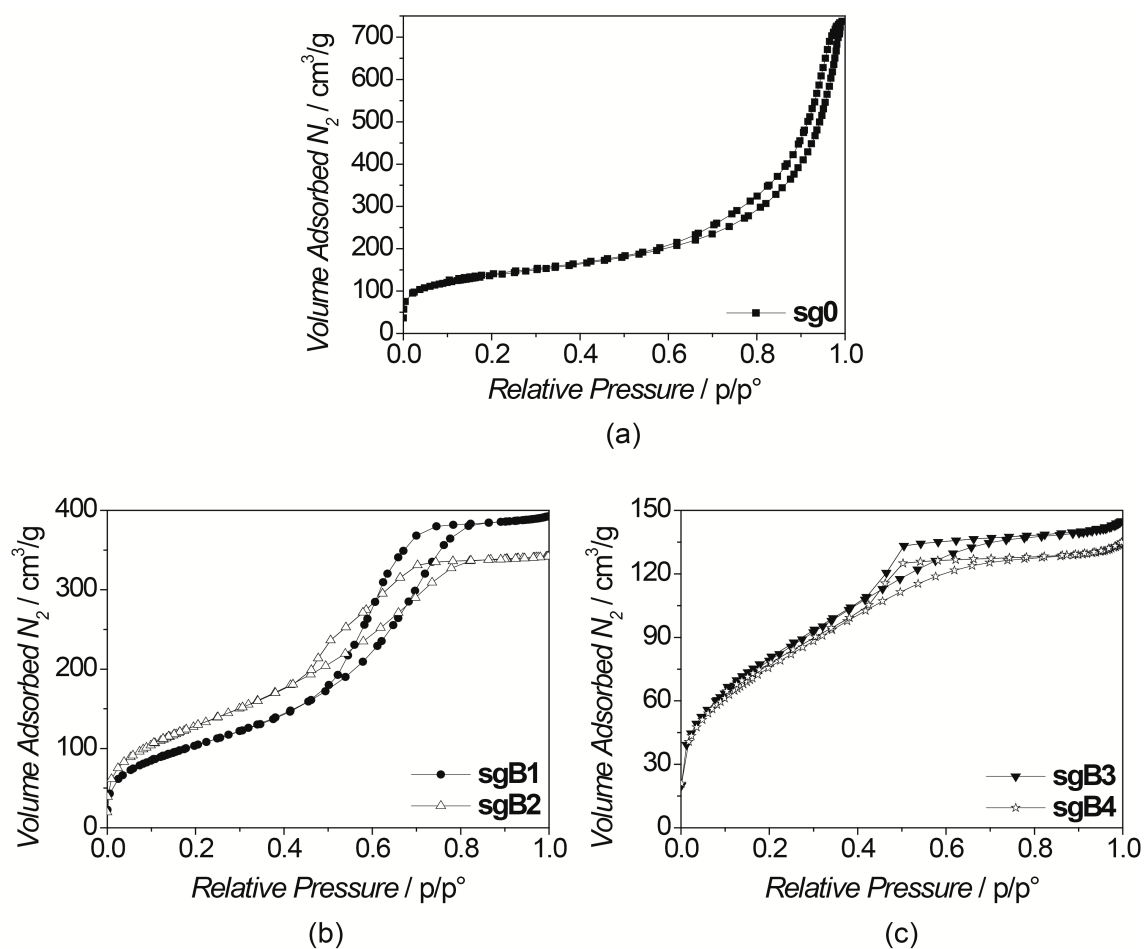

Figure S3. Nitrogen adsorption/desorption isotherms of (a) **sg0**, (b) **sgB1** and **sgB2**, and (c) **sgB3** and **sgB4** supports.

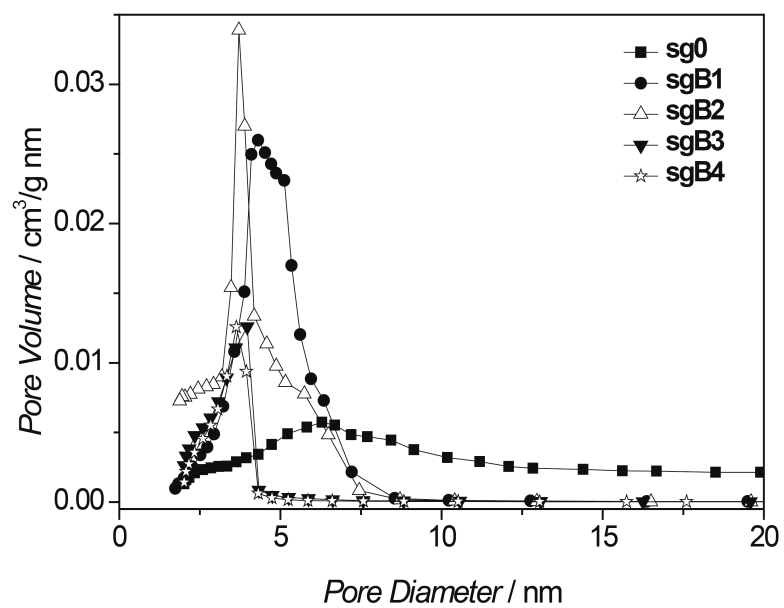

Figure S4. Pore diameter distribution of **sg0–sgB4** supports.

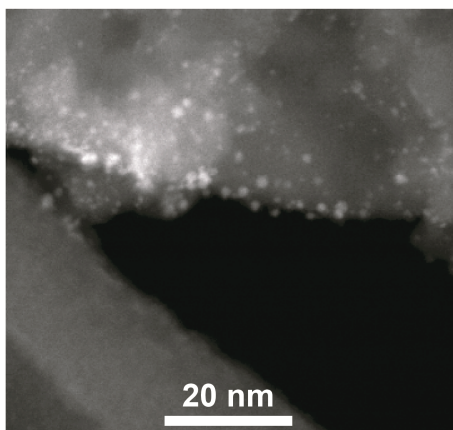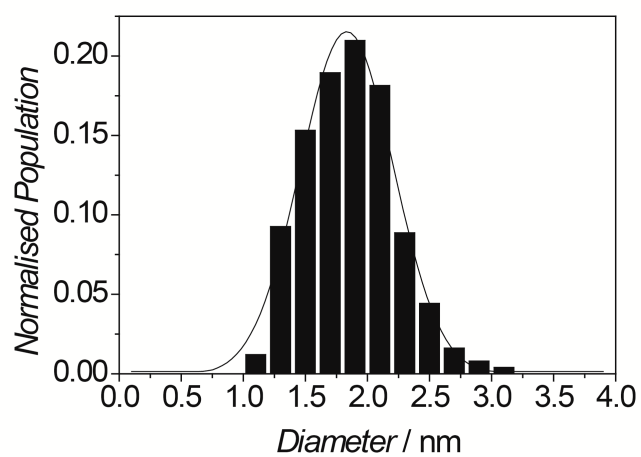

(a)

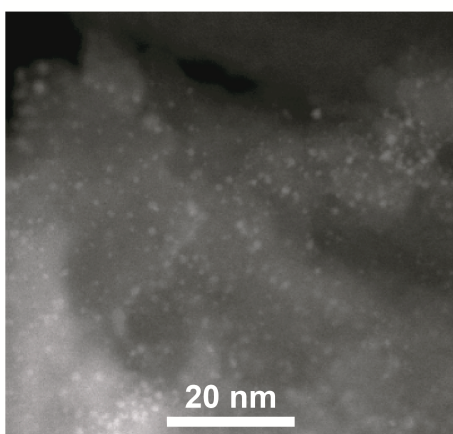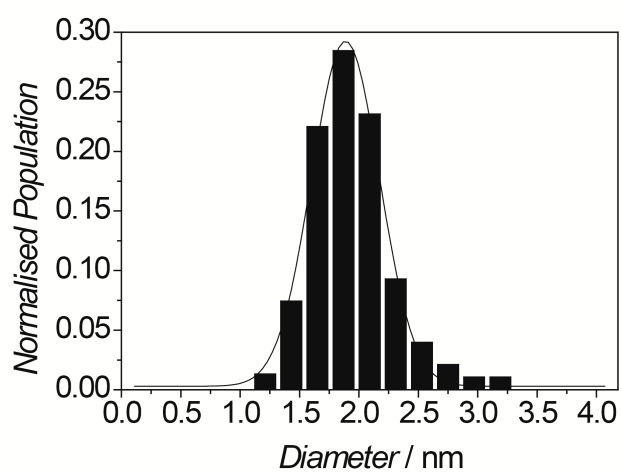

(b)

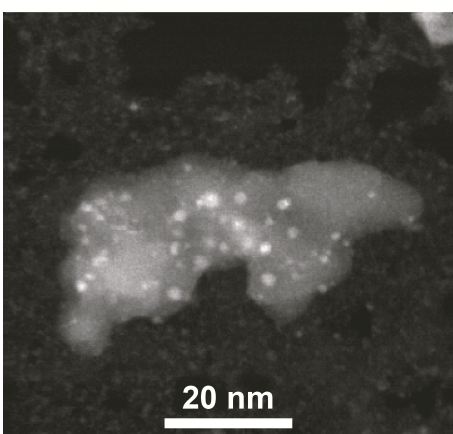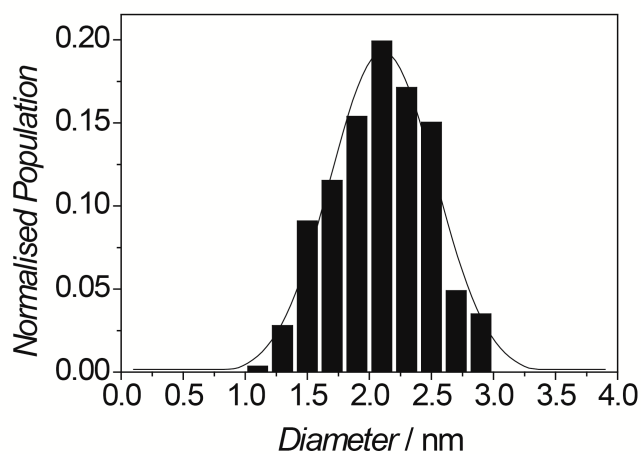

(c)

Figure S5. STEM images and histograms of the (a) Pd/**sgB1**, (b) Pd/ **sgB2** and (c) Pd/**sgB3** catalysts.

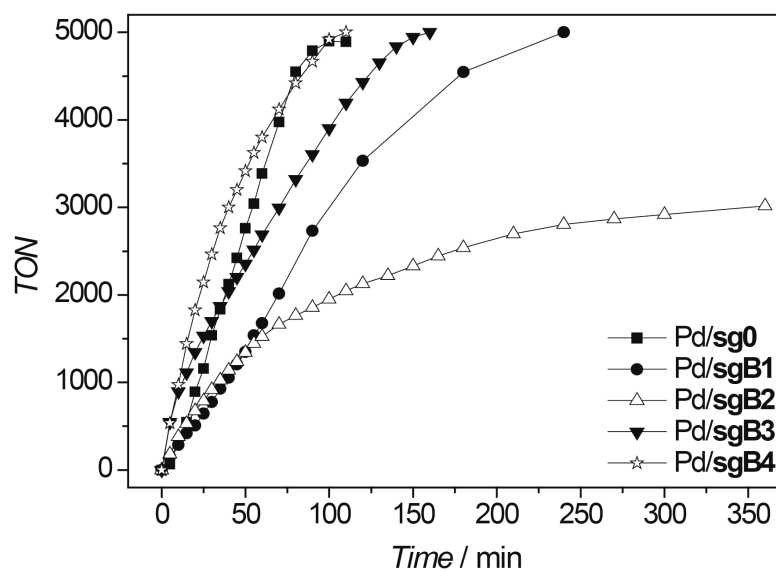

Figure S6. Hydrogenation of 1,3-cyclohexadiene: time [min] vs. TON with Pd/**sg0**–Pd/**sgB4** catalysts.

Table S3. Deuteration of 1,3-cyclohexadiene by Pd/**sg0** and Pd/**sgB4** catalysts.

Reaction scheme showing the deuteration of 1,3-cyclohexadiene (1) with 4 bar D<sub>2</sub> and a catalyst (cat.) to produce a mixture of 1,3-cyclohexadiene (2), cyclohexene (3), 1,2,3,4-tetradeuteriocyclohexene (5), 1,3,5-trideuteriocyclohexene (6), and 1,2,3,4,5-pentadeuteriocyclohexene (7).

| Entry<br>[a,b] | Catalyst        | Conv./<br>[t/ h] | % | <b>2</b> /<br>% | <b>3</b> /<br>% | <b>5</b> /<br>% | <b>6</b> /<br>% | <b>7</b> /<br>% | TOF/ s <sup>-1</sup><br>[c,d] |
|----------------|-----------------|------------------|---|-----------------|-----------------|-----------------|-----------------|-----------------|-------------------------------|
| 1              | Pd/ <b>sg0</b>  | 100 [7.00]       |   | 3               | 3               | 58              | 34              | 2               | 1.37                          |
| 2              | Pd/ <b>sgB4</b> | 100 [5.00]       |   | 2               | 2               | 58              | 34              | 4               | 1.44                          |

<sup>[a]</sup> Reaction conditions: 0.1  $\mu$ mol Pd, 1,3-cyclohexadiene/Pd = 5000, 10 mL of CH<sub>2</sub>Cl<sub>2</sub>, 4 bar D<sub>2</sub>, 40°C; <sup>[b]</sup> Conversion and selectivity determined by GC and NMR-<sup>1</sup>H/<sup>2</sup>H analysis; <sup>[c]</sup> TOF = mol 1,3-cyclohexadiene converted/(mol Pd surface  $\times$  time); <sup>[d]</sup> Calculated from the slope of plots of time vs. TON at low substrate conversions.
